# Supplementary material for: Surveying the Lettuce Genome: Genome-wide Identification of Hsfs and Hsps in Response to UV and High Light Stress
Source: Research Square preprint supplement (doi:10.21203/rs.3.rs-126898/v1), 2020-12-18
Supplement: Supplementary file 4 [file c0276f272a859100572b99ca.xlsx]

## Sheet: Table S5
Duplication	Pair1	Pair2	Similarity (%)
Tandem	LsHsp70-19	LsHsp70-20	95.2
Tandem	LsHsp70SSE-4	LsHsp70SSE-5	92.7
Tandem	LsHsp17.7-CI	LsHsp17.6-CI	96.8
Tandem	LsHsp70-25	LsHsp70-26	99.6
Tandem	LsHsp70-26	LsHsp70-27	79
Tandem	LsHsp70-27	LsHsp70-28	91.6
Tandem	LsHsp70-29	LsHsp70-30	88.9
Tandem	LsHsp70-30	LsHsp70-31	89.9
Tandem	LsHsp70-31	LsHsp70-32	68.7
Tandem	LsHsp70-32	LsHsp70-33	64.4
Tandem	LsHsp70-33	LsHsp70-34	76.4
Tandem	LsHsp18.4-CI	LsHsp18.0-CI	97.7
Tandem	LsHsp18.0-CI	LsHsp18.9-CI	99.8
Tandem	LsHsp11.8-CI	LsHsp23.8-CI	89.4
Tandem	LsCpn60α3	LsCpn60α4	81.4
Tandem	LsBiP2	LsBiP1	94.6
Tandem	LsHsp70SSE-6	LsHsp70SSE-7	83.1
Tandem	LsHsp70SSE-7	LsHsp70SSE-8	78.2
Tandem	LsHsp70SSE-8	LsHsp70SSE-9	73.2
Tandem	LsHsfB5b	LsHsfB5c	81.7
Tandem	LsHsp19.8-CII	LsHsp18.4A-CII	65.3
Tandem	LsHsp18.4A-CII	LsHsp18.2-CII	93.9
Tandem	LsHsp18.2-CII	LsHsp18.3A-CII	94.5
Tandem	LsHsp18.3A-CII	LsHsp18.3B-CII	89.3
Tandem	LsHsp18.3B-CII	LsHsp18.4B-CII	94.1
Tandem	LsHsp70-37	LsHsp70-38	83.9
Tandem	LsHsp70-38	LsHsp70-39	77
Tandem	LsHsp70-39	LsHsp70-40	81.3
Tandem	LsHsp70-40	LsHsp70-41	79.7
Tandem	LsHsp70-41	LsHsp70-42	81.4
Tandem	LsHsp70-42	LsHsp70-43	83.4
Tandem	LsHsp70-43	LsHsp70-44	81.3
Tandem	LsHsp70-44	LsHsp70-45	78.7
Tandem	LsHsp70-45	LsHsp70-46	79.1
Tandem	LsHsp90-2b	LsHsp90-2a	99.9
Tandem	LsHsp70-4	LsHsp70-5	83
Tandem	LsHsp70-5	LsHsp70-6	70.6
Tandem	LsHsp70-6	LsHsp70-7	74.6
Tandem	LsHsp70-7	LsHsp70-8	75
Tandem	LsHsp70-8	LsHsp70-9	92.7
Tandem	LsHsp70-9	LsHsp70-10	90.3
Tandem	LsHsp70-10	LsHsp70-11	88.2
Tandem	LsHsp70-11	LsHsp70-12	86
Segmental	LsClpB1	LsClpB2	94.8
Segmental	LsCpn60-5a	LsCpn60-5b	86.5
Segmental	LsHsfA4b	LsHsfA4c	67.8
Segmental	LsClpC2	LsClpC3	78.5
Segmental	LsClpC2	LsClpC1	81.6
Segmental	LsClpC1	LsClpC3	82.2
Segmental	LsHsfB4b	LsHsfB4a	73.6
Segmental	LsHsfB1b	LsHsfB1a	72.7
Segmental	LsCpn60-7b	LsCpn60-7a	86.2
Segmental	LscpHsc70-1	LscpHsc70-3	84.8
Segmental	LsmtHsc70-1	LsmtHsc70-2	84.4
Segmental	LsHsfA7a	LsHsfA7b	64.5
Segmental	LsHsfA7b	LsHsfA7c	71.8
Segmental	LsHsfA7c	LsHsfA7a	66.8
Segmental	LsHsp90-1b	LsHsp90-1a	83.6
Segmental	LsHsfB2c	LsHsfB2a	71.1
Segmental	LsHsp70-24	LsHsp70-47	83.2
Segmental	LsHsp70-28	LsHsp70-35	78.2
Segmental	LsHsp70-27	LsHsp70-35	78.9
Segmental	LsHsp70-26	LsHsp70-35	82.8
Segmental	LsHsp70-25	LsHsp70-35	82.9
Segmental	LsHsfA1a	LsHsfA1b	50.6
Segmental	LsHsp70-16	LsHsp70-13	65.2
Segmental	LsCpn60α3	LsCpn60α1	74.7
Segmental	LsCpn60α4	LsCpn60α1	83
Segmental	LsCpn60-4b	LsCpn60-4a	87.3
Segmental	LsHsfB5b	LsHsfB5a	48.8
Segmental	LsHsfB5c	LsHsfB5a	52
Segmental	LsHsfB3a	LsHsfB3b	52.5
Segmental	LsHsfB2a	LsHsfB2b	52.5
Segmental	LsHsfB2b	LsHsfB2c	54.2
Segmental	LsHsfC1c	LsHsfC1g	63.4
Segmental	LsHsfC1g	LsHsfC1f	61.7
Segmental	LsHsfA4a	LsHsfA4b	57.6
Segmental	LsHsfA4a	LsHsfA4c	56.8
Segmental	LsHsp17.6-CI	LsHsp17.8-CI	81.3
Segmental	LsHsp17.7-CI	LsHsp17.8-CI	82.3
Segmental	LsHsp18.9-CI	LsHsp23.8-CI	93
Segmental	LsHsp17.9-CI	LsHsp23.8-CI	92.8
Segmental	LsHsp17.9-CI	LsHsp20.6-CI	83.1
Segmental	LsHsp21.8-ER	LsHsp37.6-ER	97.2
Segmental	LsHsp21.8-ER	LsHsp23.2-ER	54.5
Segmental	LsHsp15.6-CIV	LsHsp19.2-CIV	76.6
Segmental	LsHsp17.8-CIII	LsHsp20.7-CIII	69.5
Segmental	LsHsp26.6-P	LsHsp26.1-P	53.8
Segmental	LsHsp24.6-M	LsHsp24.4-M	70.8
Segmental	LsHsp24.6-M	LsHsp25.1-M	50.7
Segmental	LsHsp24.4-M	LsHsp25.1-M	49.8
Segmental	LsCpn60-9a	LsCpn60-9b	86.3
Segmental	LsCpn60β1	LsCpn60β3	65.1
Segmental	LsCpn60β2	LsCpn60β3	67.4
Segmental	LsCpn60α4	LsCpn60α2	64.6
Segmental	LsHsp60-1	LsHsp60-3	68.9
Segmental	LsHsp60-2	LsHsp60-3	69.2
Segmental	LsHsp70-31	LsHsp70-33	67.6
Segmental	LsHsp70-23	LsHsp70-37	82
Segmental	LsHsp70-23	LsHsp70-38	75.6
Segmental	LsHsp70-23	LsHsp70-39	79.1
Segmental	LsHsp70-23	LsHsp70-40	79.8
Segmental	LsHsp70-23	LsHsp70-41	77.4
Segmental	LsHsp70-23	LsHsp70-42	81.2
Segmental	LsHsp70-23	LsHsp70-43	79.8
Segmental	LsHsp70-23	LsHsp70-44	79.8
Segmental	LsHsp70-23	LsHsp70-45	74.7
Segmental	LsHsp70-23	LsHsp70-46	80.5
Segmental	LsHsp70SSE-3	LsHsp70SSE-6	65
Segmental	LsHsp70SSE-3	LsHsp70SSE-7	68.5
Segmental	LsHsp70SSE-3	LsHsp70SSE-8	64.4
Segmental	LsHsp70SSE-2	LsHsp70SSE-9	69.9
Segmental	LsHsp90-5	LsHsp90-6	66.6
