# Supplementary material for: Surveying the Lettuce Genome: Genome-wide Identification of Hsfs and Hsps in Response to UV and High Light Stress
Source: Research Square preprint supplement (doi:10.21203/rs.3.rs-126898/v1), 2020-12-18
Supplement: Supplementary file 5 [file db416d2018f7be8a5903d1d5.xlsx]

## Sheet: Sheet1
Supplemental table S6. Primers used in qRT-PCR analysis
Gene name	Forward primer (5'-3')	Reverse primer (5'-3')
LsTUB	TAGGCGTGTGAGTGAGCAGT	AACCCTCGTACTCTGCCTCTT
LsHsfA1a	CTCCAGCTTTGTTCGACAGC	AGCAGGTGTTTTTGGCCTCT
LsHsfA7c	TCTCCAGCTTCATCAGACAGC	ATATGCCTTTGGCCCCTCAA
LsHsfB1a	CCAGCTTTGTTCGTCAGCTT	TAGGTCCTTCCGACCTCGTT
LsHsfC1c	ACCCCTCGATTTCTCCCAAC	CTCAAAAACCACTCGTTCGCA
LsHsp17.8-CI	GAAATCAAGGTGGAGGTGGAG	GTTCCACACGATGCCAAGTA
LsHsp17.9-CI	CTGAAGAAAGAGGAGGTGAAGG	GCCACTTGTCGTTCTTCTCT
LsHsp17.7-CI	GGTGAGAGGAGTGTTGAGAAAG	CGAATTCTCCGGCAACCTAA
LsHsp18.2-CII	GGGTTTTGATTCGCCGCTT	ATAAGCGCGAGTAGGTCCGATA
LsHsp18.4B-CII	TTTCGTTGCCGGAAAATGCT	CGGTAGTTTCTCCACCGTGA
LsHsp17.8-CIII	ACCTCCTCGGAAGCTGATGA	CTGTCAACACCCCGTTTTCG
LsHsp22.0-CV	ACCCATGTGTGGATTGGCTT	TCCACACCCCACTAATCTCCA
LsHsp23.2-ER	GCTGTGAACGGTCGTATGGA	CAAGCCTCGCATTCACCTTG
LsHsp24.4-M	TGGGGAATCCGCTTATGTCG	TCTTCCTTTGCGTCCCATCC
LsHsp26.1-P	ATGCGTCAAATGCTGGACAC	AATGTTCCAGGCCGTACCAG
LsHsp15.6-PX	GAGTCGAGGGTGTTGGGTTT	CGGCAAAACCACCGTCAAAA
LsCpn60-2	GGGCAGGGATAGTTGCACTT	GTCCAGCCCATCCAAGAACA
LsCpn60-4a	AGGCATCGAAAAGTGGCCTTA	ATTTTGTGCCAAGGTTCGGG
LsCpn60α3	CCTCAAGGTCGCTGCCATTA	CCAAGCTGCTCGACCGATAA
LsCpn60α4	GGAGCTGGAAAAGAGAGCCC	GGCATCAGCAATCATGGCAC
LsCpn60β1	GGGTGGTGTTGCTGTCATTC	CACCACCCACAACAACTCCT
LsHsp60-1	GCCCCTGGTTTTGGAGAGAA	TCCCTAGCATTTCTGGTGCC
LsHsp70-1	ATCTGACGAAGCGGTTGCAT	CACCAAGTGAAAGTGGGACG
LsHsp70-4	TAGCCATGACAAGCAGAGGC	CGTCATCGTCACGTTCATGC
LsHsp70-11	GGTAAGAGTGGTCTTTGCCGT	AAGCCTCTGCTTGTCATTGGTG
LsHsp70-25	AGTGGCGATGAATCCGACAA	GGCCGGGAGTGACCTTAAAA
LsHsp70-28	TTGCTAGGATGTACCAGGGC	CTTCGATCTTTGGTCCGGCG
LsHsp70-39	GGCTCCAAGAGGAGTTACCC	TCTCCGATGTGACTGTGAGG
LsHsp70t-1	ATGCCGGGAGAACAGAATCC	AGAACATCCGCAGTCAACCC
LsBiP1	TCGTCTTAATCGGTTGCCTATC	CCAACACACGAGTAGGTAGTTC
LsmtHsc70-2	CCTCTCATCTGCGTCTTTATCC	TGAGCTGAAAGGTCTGGAAAG
LscpHsc70-1	GCGGGAGATGTGAGTGATATT	CTCGGGAGAGTTGTGTTTCTT
LsHsp70SSE-4	CAGCAGGGGTCACTTCCAAA	GCCTACATGCCCTGTCGATT
LsHsp70SSE-5	AAGCAGAGGCACTTGACAGG	CTTGTGGCTCACCTTCCTGG
LsHsp90-1a	ATGATTGGACAGTTCGGTGTAG	CCCAGATGTATTGCTCGTCAT
LsHsp90-2a/2b	GAGTGAAGACGAGAAGCAGAAG	TGTCTCCCAACACATCCTTTATC
LsHsp90-5	AGCAAAAAGGGCTGTGGAGT	GCCACCGCCATCATCTCATA
LsHsp90-7	GCTTTGATGGAGAGTGGATTTATG	CAGCCGCATCCTTACTAATACT
LsClpB1	GCAGAGATGAATGGGGAGGA	CGCCATTTGCATTTGTGTTCA
LsClpB3	GAGGCTGAGTTGGCTCTGTT	ACGTTCCGCTTGTTGGATCT
LsClpB4	ACCCGCATACGCTCAATCAA	TTCCGCAGCACGGTTTAGAT
LsClpC2	GCCATTGCAGAAGGTCTTGC	TCCCCTCGGTATTTTGTGCC
LsClpD	CACAAAAGCCCTTGCTGCTT	TCCCACCTTCACCATACCCT
